# Supplementary material for: Missense variant in LOXHD1 is associated with canine nonsyndromic hearing loss
Source: Hum Genet. 2021 May 13;140(11):1611–8. doi: 10.1007/s00439-021-02286-z (PMC8521602; doi:10.1007/s00439-021-02286-z)
Supplement: Supplementary file 1 — Supplementary file1 (XLSX 11 kb) [file 439_2021_2286_MOESM1_ESM.xlsx]

## Sheet: Sheet1
Online Resource 2. Coordinates of 22 ROH shared by and specific to three affected dogs.
Chromosome	Start	End	Length (kb)
1	20735772	22453484	1717.71
1	40361808	41616586	1254.78
1	67943666	89271008	21327.3
2	1401022	2995833	1594.81
6	15351244	21122718	5771.47
6	28374590	30484900	2110.31
6	30799611	30986893	187.282
7	25579335	25858763	279.428
7	41209005	45534147	4325.14
7	50807567	56014754	5207.19
8	32863608	33246793	383.185
8	33311503	35078985	1767.48
8	35558552	41342036	5783.48
11	23340319	24542417	1202.1
13	52124131	53202750	1078.62
18	42131293	43853831	1722.54
18	44025816	45093592	1067.78
24	22582438	26605423	4022.99
30	29476297	29550844	74.547
30	30646858	30799442	152.584
37	28165484	28950091	784.607
38	22465407	23911629	1446.22
